# Supplementary material for: Improvement by public participation? The case of the German calculation basis for the dose assessment for final disposal of high-level waste (HLW)
Source: Copernicus journal article supplement (doi:10.5194/sand-2-247-2023), 2023-09-06
Supplement: Supplementary file 1 [file sand-2-247-2023-supplement.pdf]

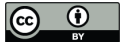

*Supplement of*

**Improvement by public participation? The case of the German calculation basis for the dose assessment for final disposal of high-level waste (HLW)**

**Volker Hormann et al.**

*Correspondence to:* Clemens Walther ([walther@irs.uni-hannover.de](mailto:walther@irs.uni-hannover.de))

The copyright of individual parts of the supplement might differ from the article licence.

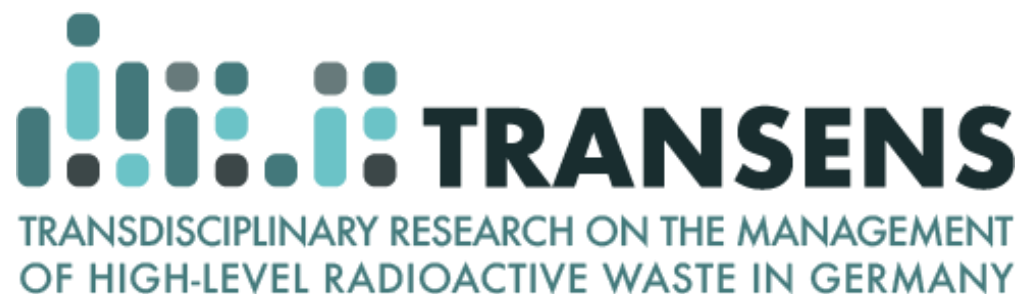

## Improvement by Public Participation? The Case of the German Calculation Basis for the Dose Assessment for Final Disposal of HLW (BeGru)

*Volker Hormann, Anna Kogiomtjidis, Clemens Walther*

- 1.) Critical Discussion of BeGru Model
- 2.) Public participation by BMUV / BASE

## Radioecological modeling of radionuclide transport in the biosphere.

### Goal:

*Estimation of the radiation exposure after release of radionuclides into the ecosphere*

Dose as "**Indicator**"

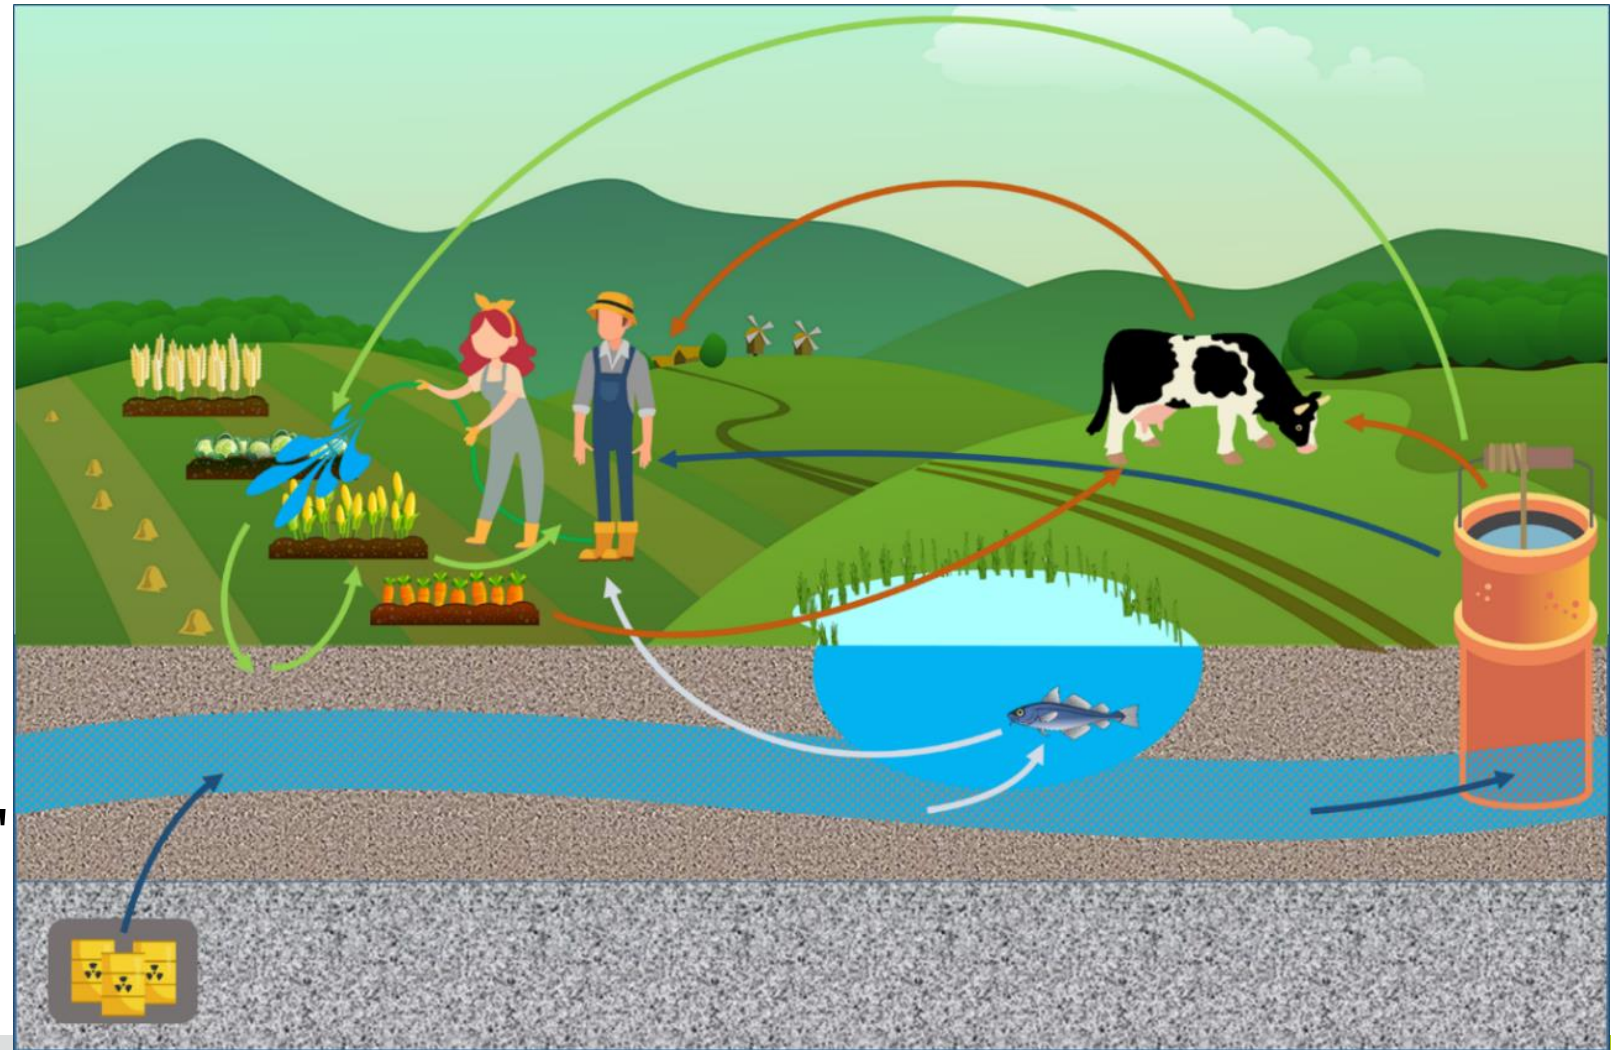

- Concept of "representative persons" (based on ICRP 101):  
*"Hypothetical individuals (...) who are representative of higher-exposure populations in the relevant age group based on their lifestyle habits."*
- Model scenario: a farm managed by 10 people  
→ Self-sufficiency (drinking water 100 %, food 50 %)
- Production of food and residence of people at the "most unfavorable impact points".
- initially cool temperate climate, then climatic developments
- different usage scenarios (well water, surface water)

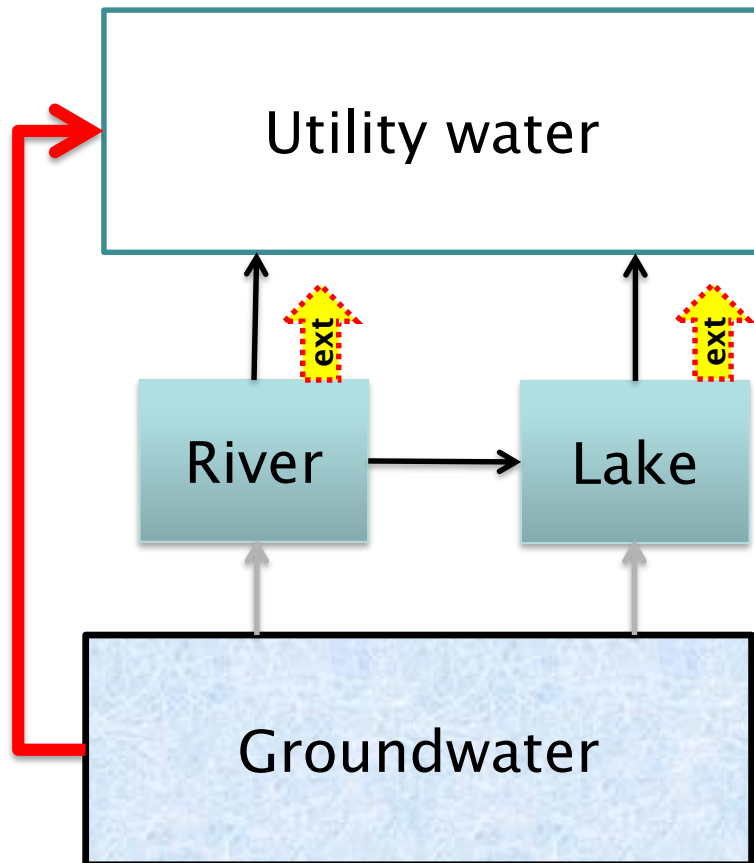

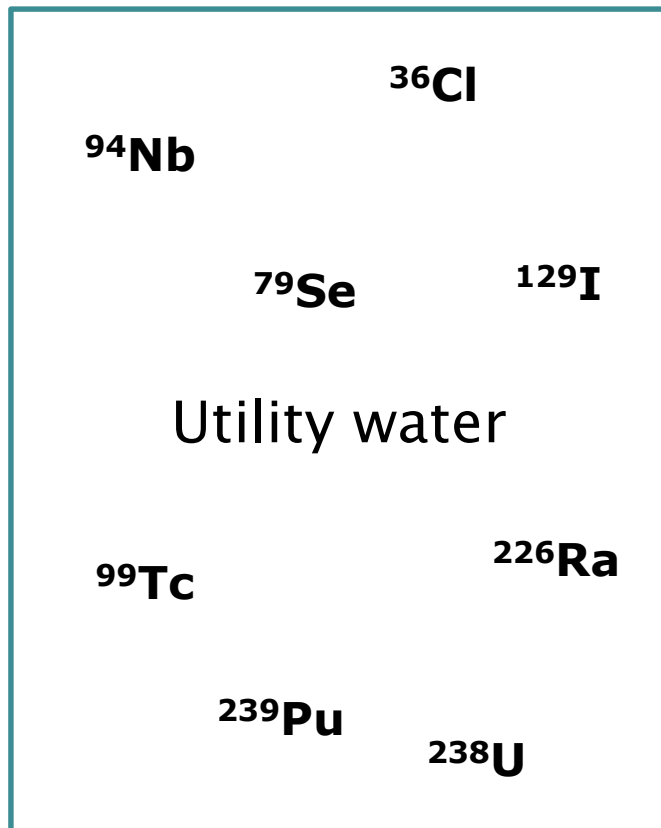

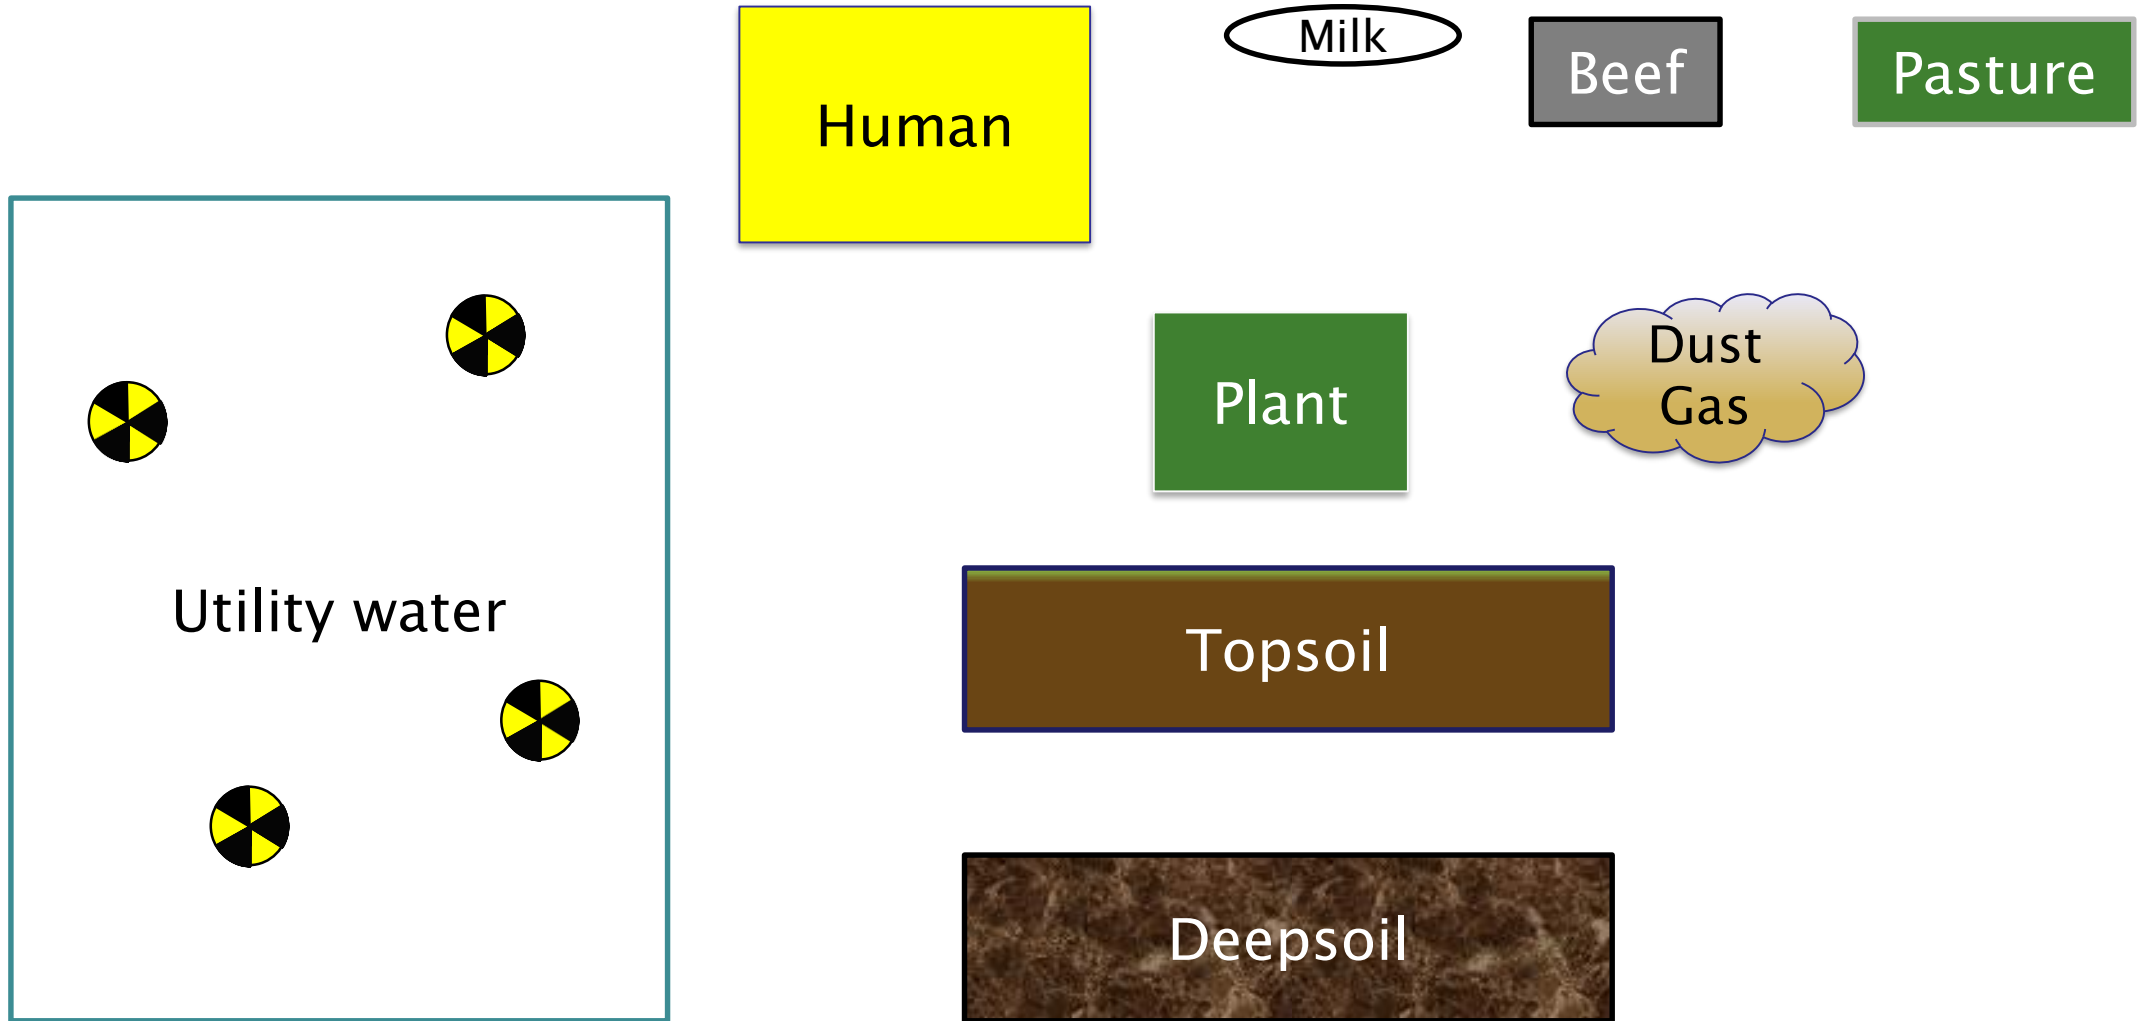

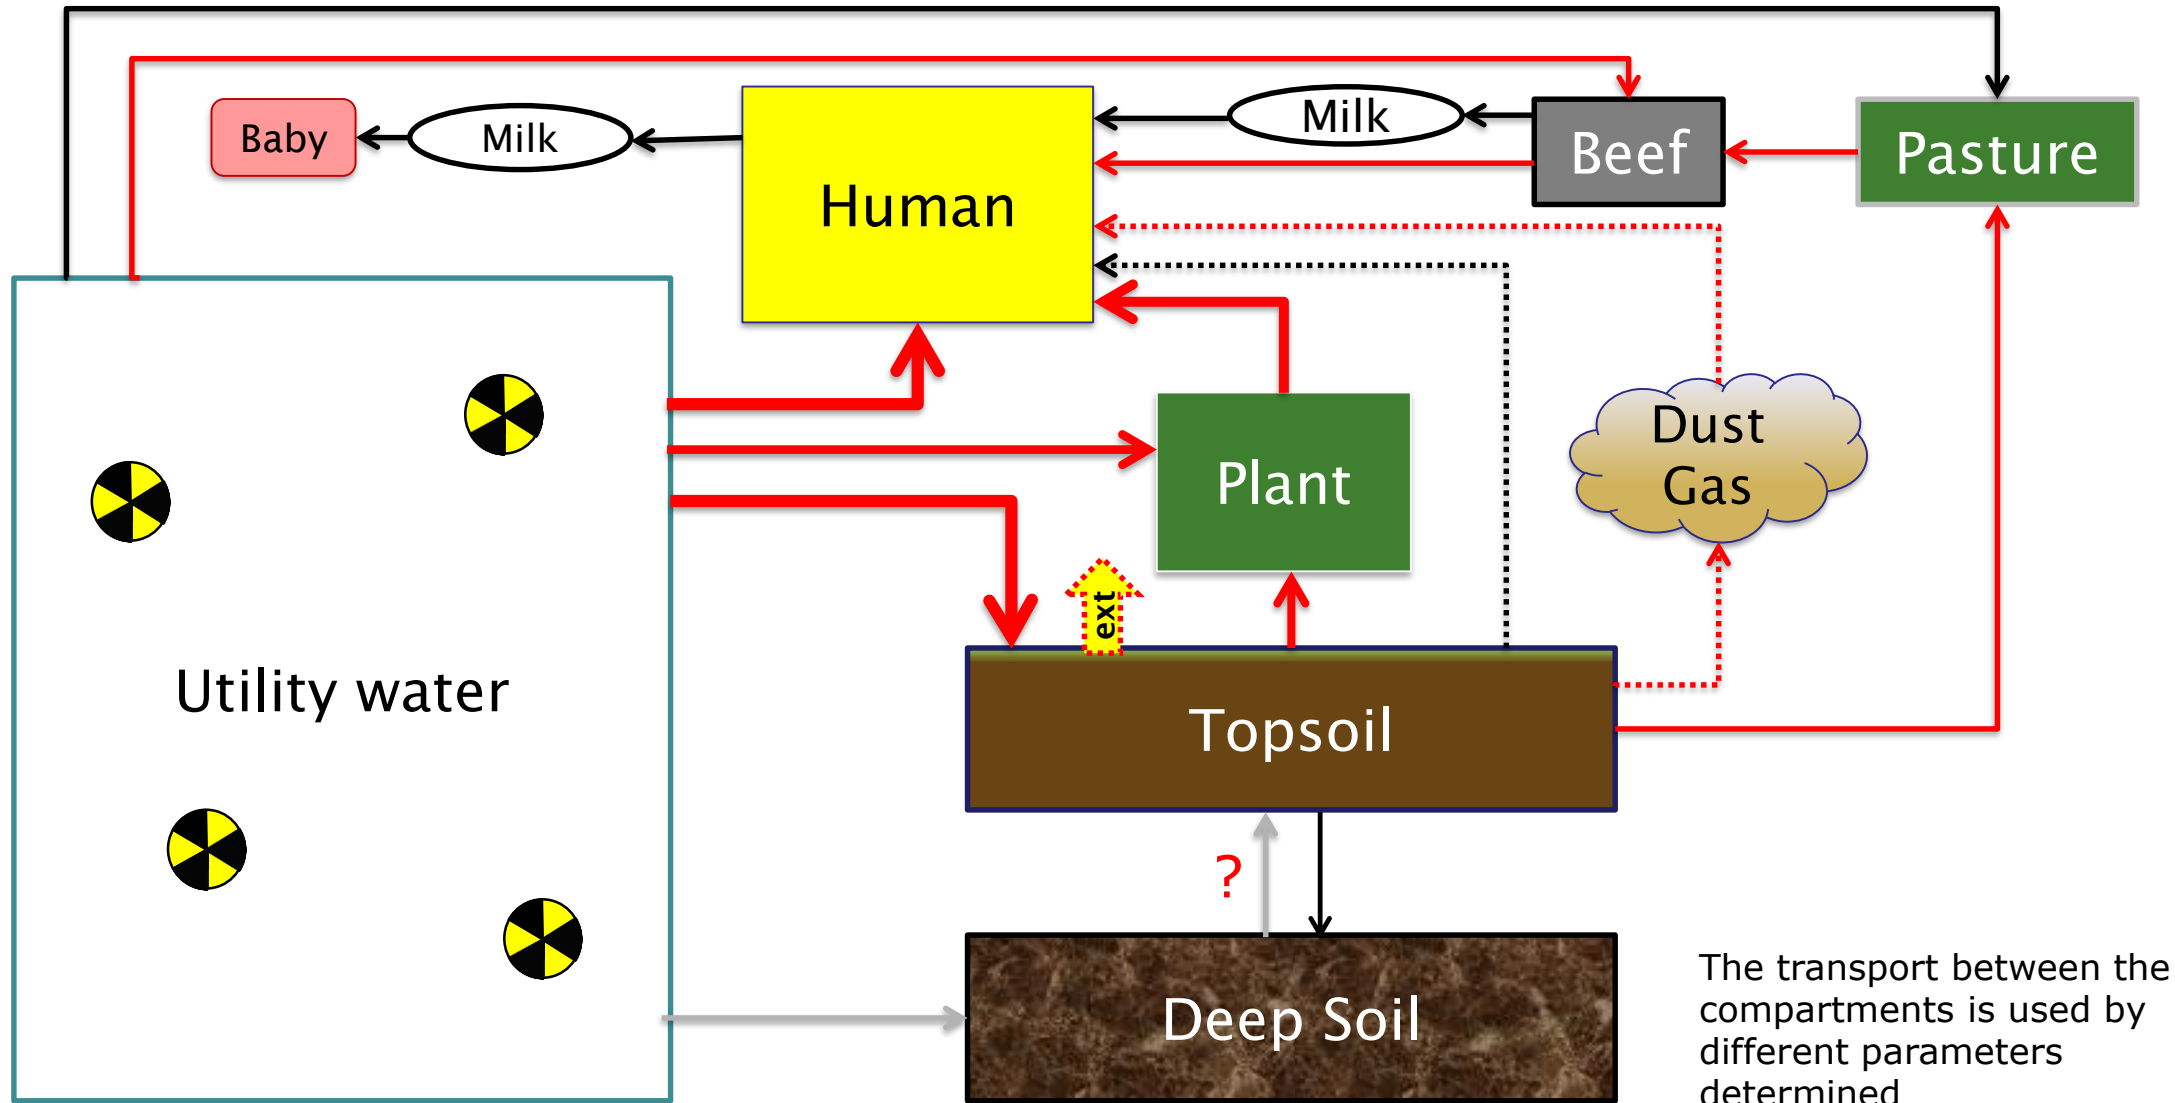



- Mathematical description of radionuclide transport between compartments by (differential) equations.

- Simple example:

Concentration of the Radionuclide  $r$  in fish (Bq/kg)

$$C_r^{Fish} = C_r^{Water} \cdot T_r^{Fish}$$

Concentration in water (Bq/L)

Transfer factor water  $\rightarrow$  fish (L/kg)

- Subsequently, calculation of the dose contribution from this compartment:

annual effective dose from fish consumption (Sv)

$$E_r^{Fish} = U^{Fish} \cdot C_r^{Fish} \cdot g_{g,r,eff}$$

Annual consumption of fish (kg)

Concentration in fish (Bq/kg)

Dose coefficient for ingestion of radionuclide  $r$  (Sv/Bq)

which parameters are most important?

- (1) Activity Concentration
- (2) Irrigation / Drinking water quantity
- (3) Consumption rates
- (4) Soil-plant transfer factor
- (5) Interception factor  
(proportion that remains on the plant when irrigated)
- (6) Retention time of the RN in the soil  
(BeGru: 3 categories).

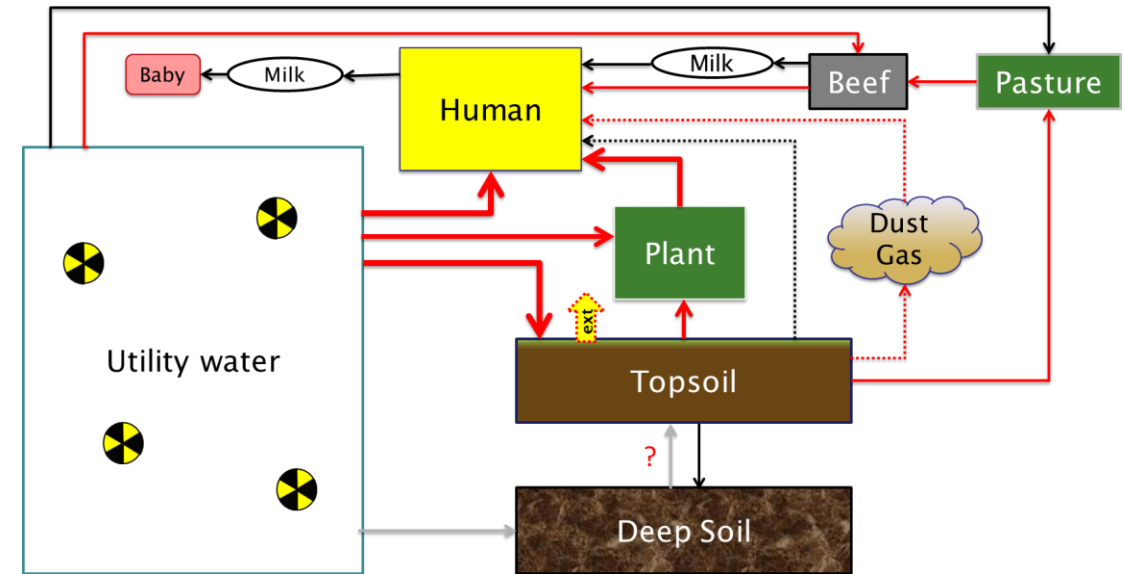

model and nuclide dependent!

estimated uncertainties:

- (1) Model dependent
- (2) Factor 2
- (3) Factor 2
- (4) nuclide-, plant- and soil-dependent, exceeding a factor of 10
- (5) plant-dependent, up to factor 10
- (6) nuclide- and soil-dependent, exceeding a factor of 10

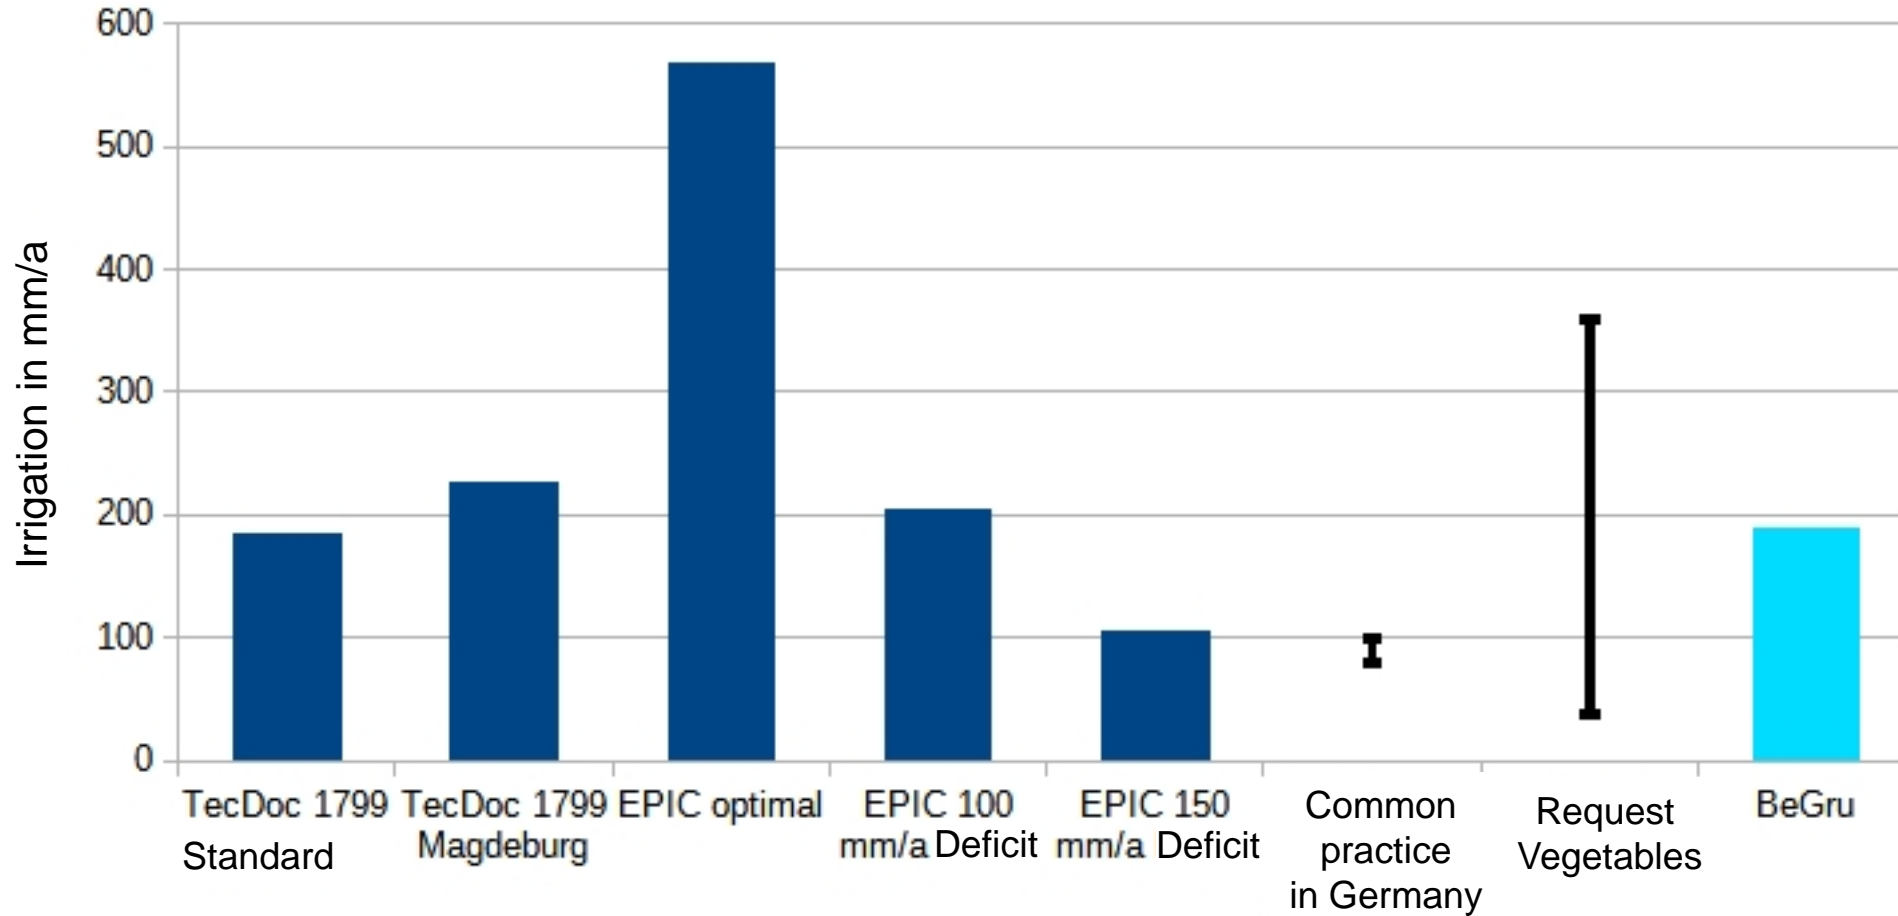

IAEA TecDoc 1799: Reference Models from the EMRAS II Program

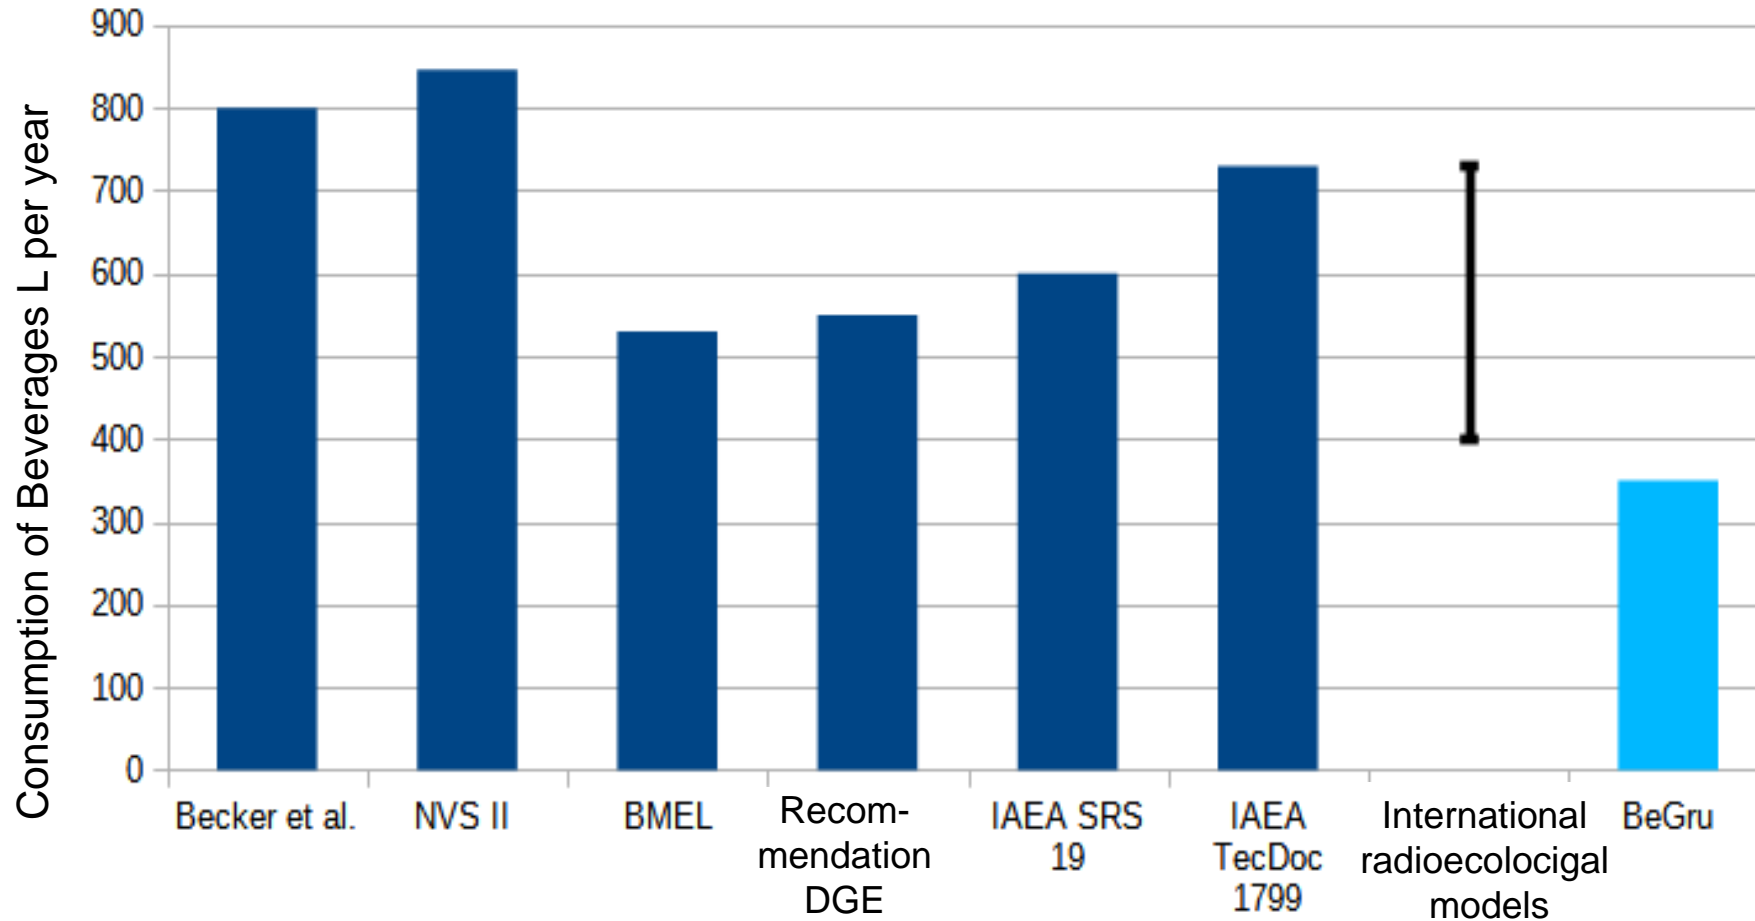

for the other foodstuffs, the BeGru values are close to those from national and international studies

transfer factors for leafy vegetables in IAEA TecDoc 1616 (2009) and the German regulations (where leafy vegetables = other vegetables)

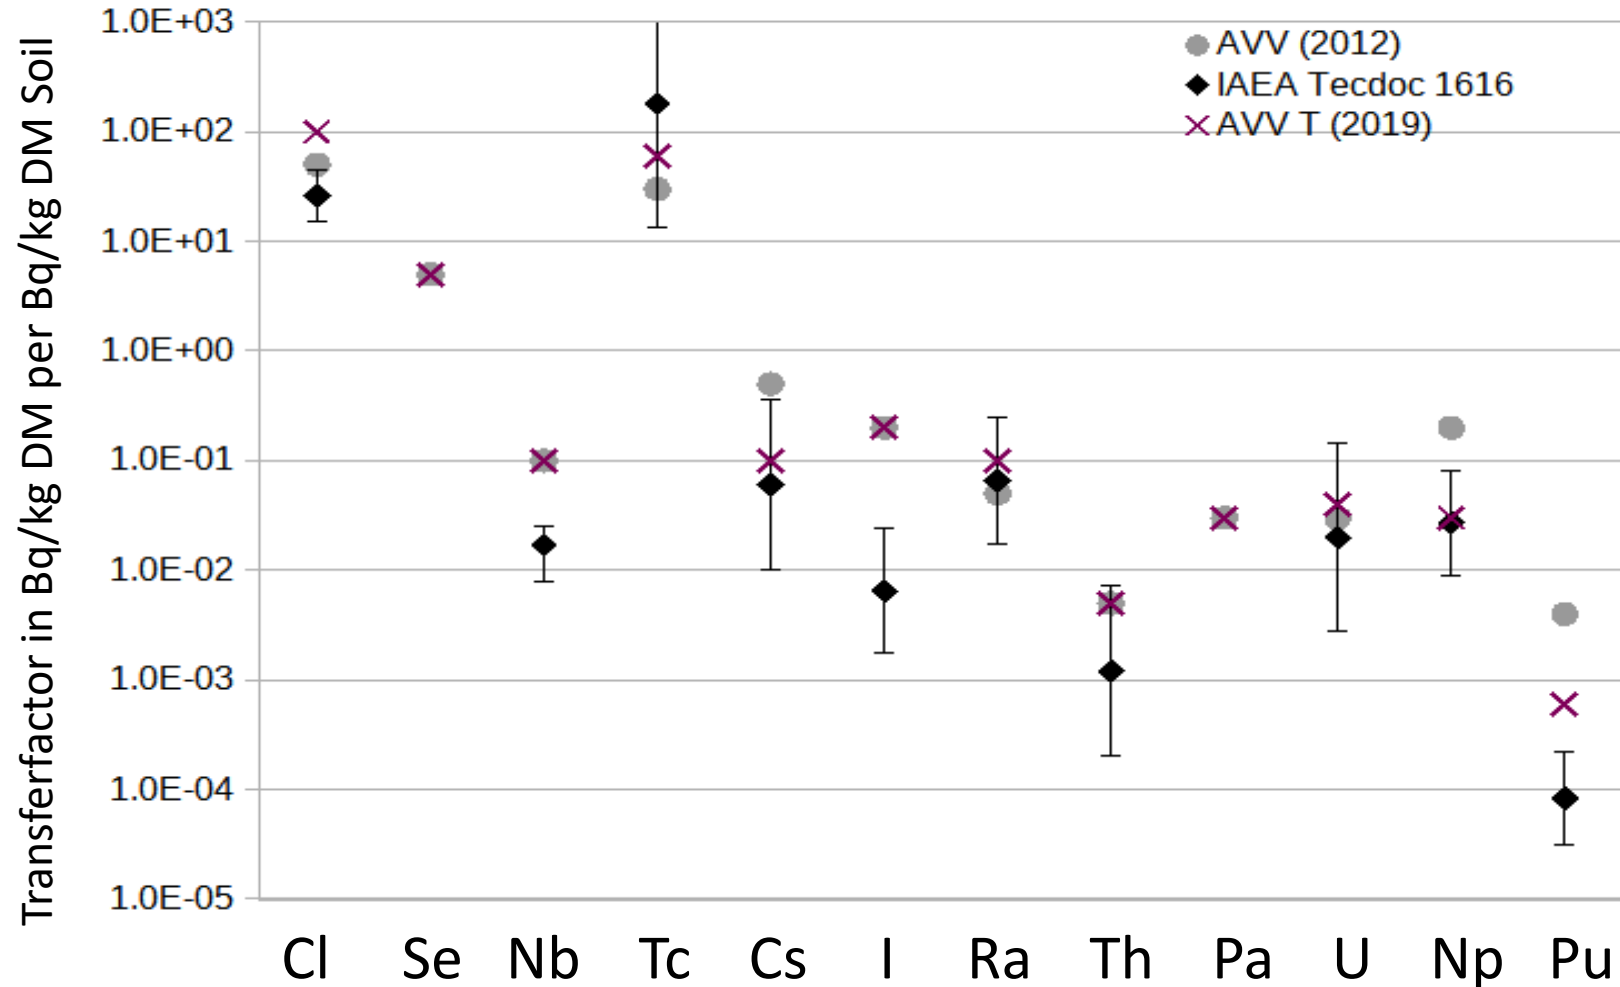

transfer factor forage-meat in the literature compared to BeGru/AVV

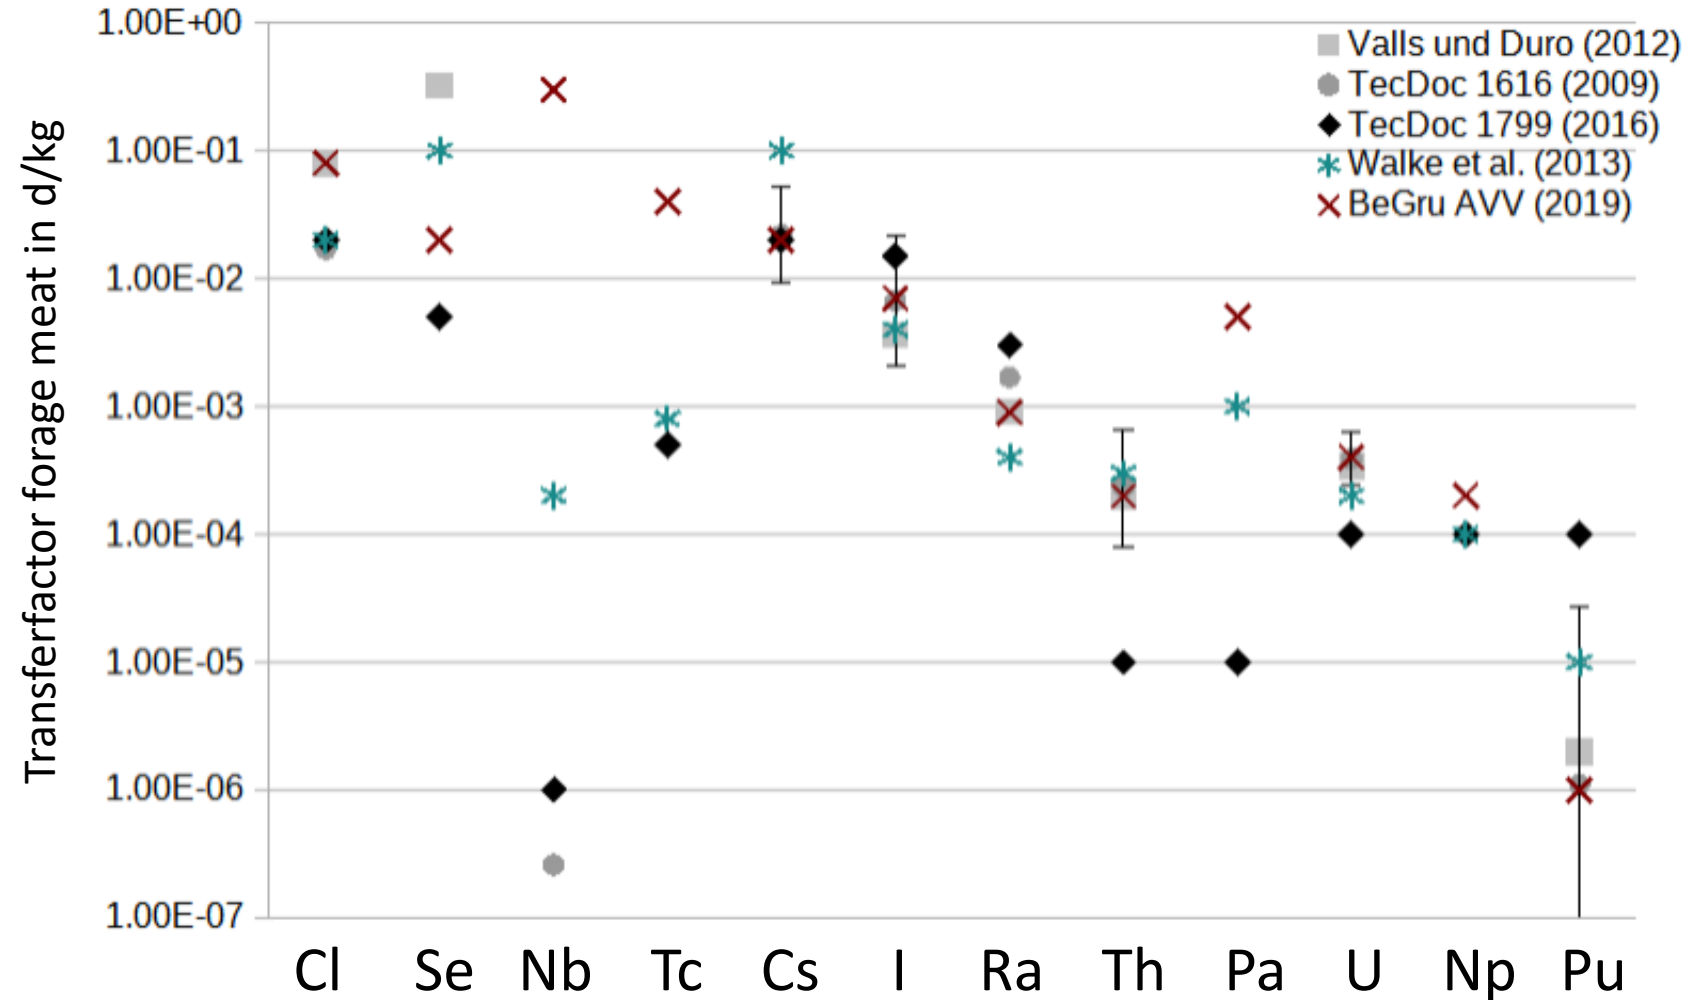

using AVV/BeGru values

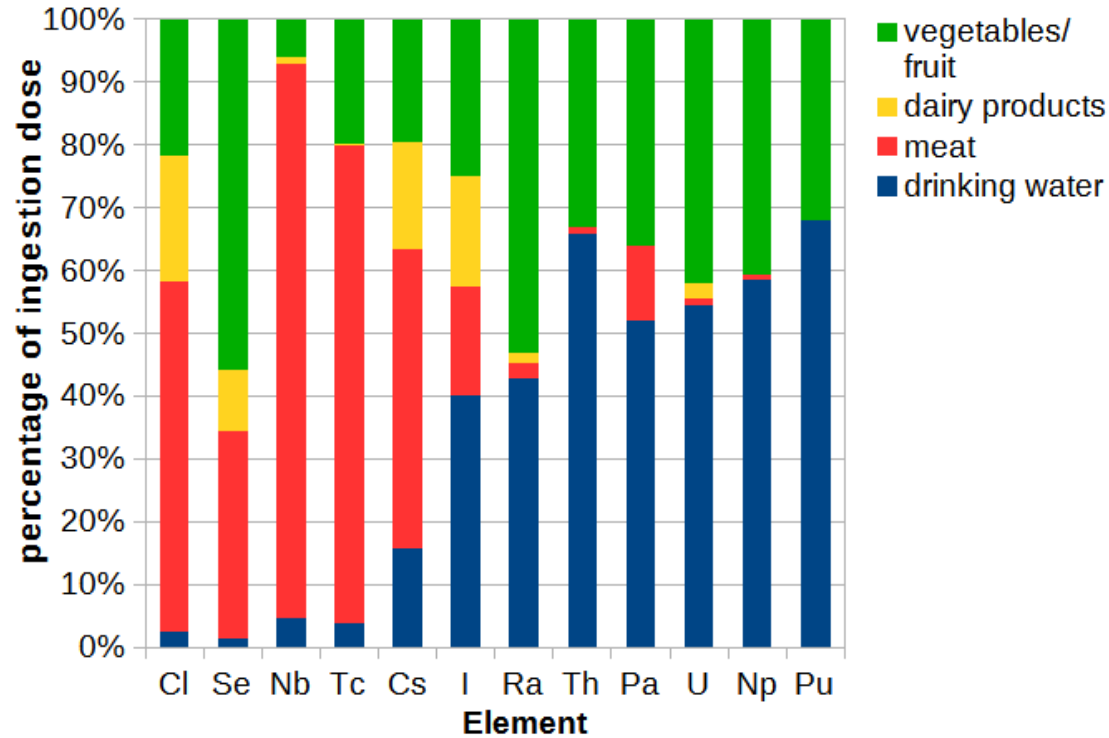

using values from IAEA TecDoc 1799

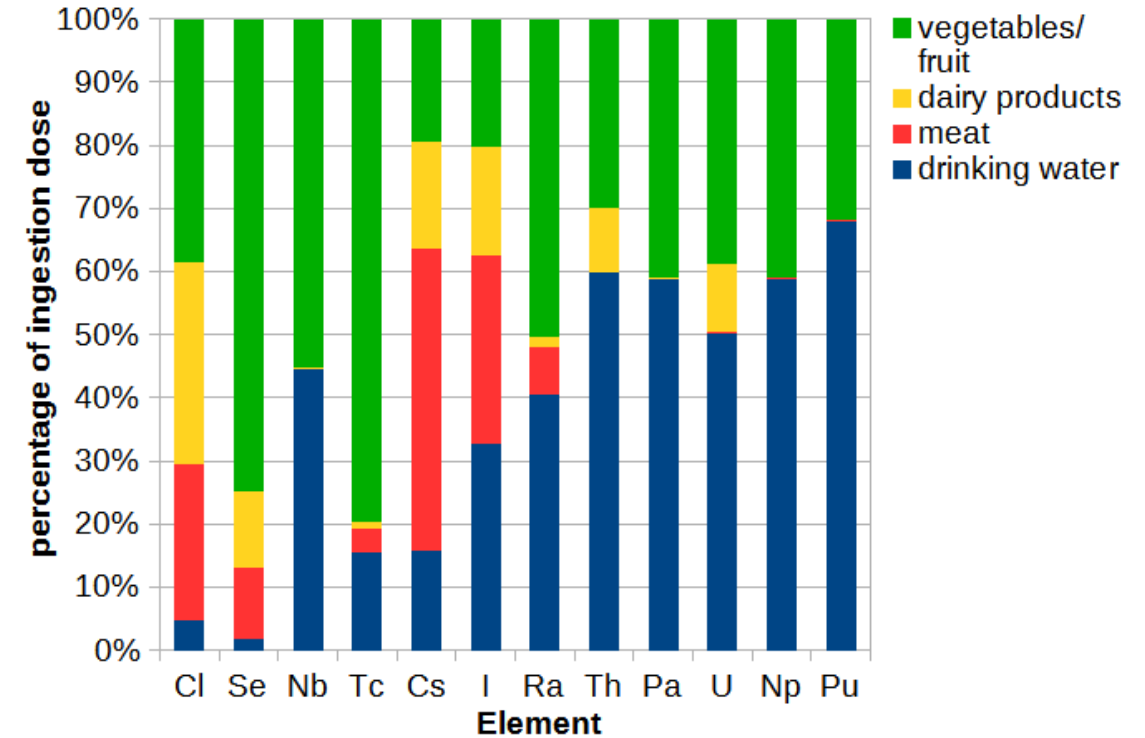

- Sources and uncertainties for parameter values are not given
  - Comparison of the values with those from the literature (e.g. IAEA tables, other radioecological studies).
  
- In order not to underestimate the indicator dose the BeGru model contains various conservative assumptions (higher exposed individuals/worst impact sites).
  
- Some further examples:
  - Multiplication of the consumption quantity that provides the highest ingestion dose at medium consumption by a factor of 1.6 - 5 (depending on the food)
  - if both surface water (SW) and ground water (GW) can be used, the less favorable one is always assumed
  - No sedimentation, SW is not filtered (but sedimentation is assumed in the calculation of external exposure at the shore).



- Danger: Accumulation of conservatisms
- possible result: unrealistically high total dose values
- In contrast, the requirement from the EndlSiAnfV § 7 that the estimated dose value (for expected developments) should be in the range of **10  $\mu\text{Sv}$**  per year is itself also conservative

Annual dose due to natural radioactivity in Germany:  
**1000 - 10000  $\mu\text{Sv}$** , mean value: **2100  $\mu\text{Sv}$**



- 2020: draft of the calculation basis for the estimation of radiation doses due to the storage of highly active nuclear waste ("BeGru") was issued by BASE and BfS

## Berechnungsgrundlage für die Dosisabschätzung

In einem Endlager für hochradioaktive Abfälle sollen die radioaktiven Stoffe für eine Million Jahre sicher eingeschlossen bleiben. Die Bundesgesellschaft für Endlagerung (BGE) mbH muss diese Sicherheit bei der Standortsuche bewerten und dazu jeweils eine mögliche zusätzliche Strahlenexposition für Menschen aus den Abfällen berechnen.

Bundesamt für die Sicherheit der nuklearen Entsorgung

Darstellung von natürlicher Strahlung in einer Nebelkammer

### Erläuterung der fachlichen Hintergründe

Die Berechnungsgrundlage für die Dosisabschätzung ist ein fachlich und wissenschaftlich anspruchsvoller Text. Die hohe Fachlichkeit lässt sich nicht vermeiden.

Um auch Interessierten ohne Vorkenntnisse die Auseinandersetzung mit dem Thema zu ermöglichen, hat das BASE zu einigen Aspekten kurze Erläuterungspapiere verfasst und vertiefende Informationen übersichtlich aufbereitet.

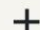

Mehr Anzeigen

- BASE provided supplementary explanation of the rather complicated basics on its website

<https://www.endlagersuche-infoplattform.de>

- April 2022 BASE invited the public to comment on the BeGru draft
- Until June 2022 ca 580 comments and suggestions submitted (ca. 60 by IRS especially concerning radioecological modelling)
- Published on website

## Vom Entwurf zur Endfassung

Alle eingegangenen Anmerkungen wurden in einer Tabelle erfasst und entsprechenden Textstellen im Entwurfstext zugeordnet. Dieses Vorgehen ermöglichte es, Kommentare zusammenhängend zu beraten.

Diese Beratung gebündelt zu Themenblöcken fand in einem Fachworkshop vom 29. Juni bis 1. Juli mit Teilnehmenden aus Wissenschaft und der Öffentlichkeit statt. Die Diskussionsergebnisse wie auch Notizen zur Überarbeitung sind in der Kommentartabelle erfasst und diese zeigt, wie BASE und BfS mit den Kommentaren umgegangen sind.

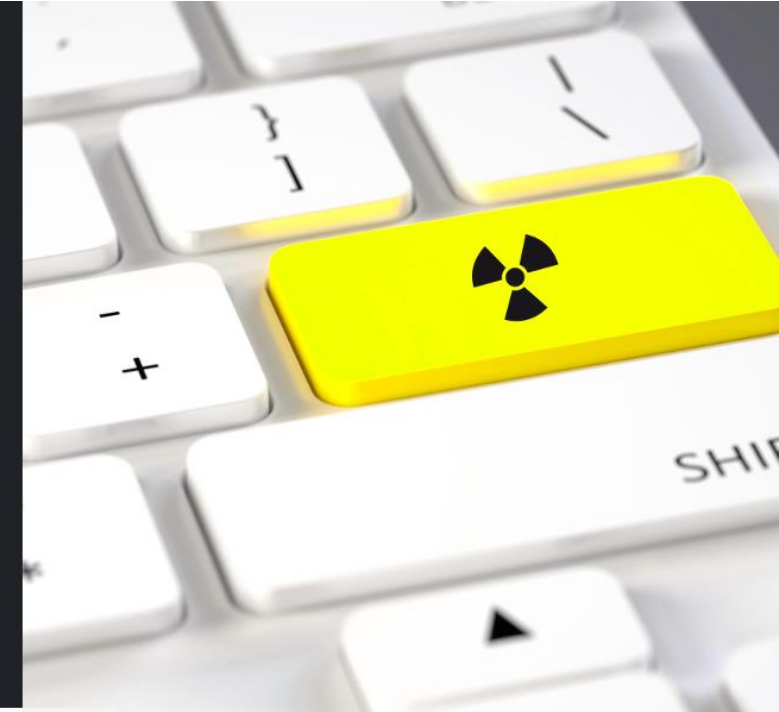

- hybrid event (presence/online)
- ~ 15 persons present, about 50% from BASE and BfS, 3 from BGE
- online: representatives from BfS, BMUV and SSK
- few members of the public
- initially focused on terms and definitions, discussion of radioecological topics and issues almost only on morning / noon 01.07.2022
- due to the large number of comments (577 in the table), **only a subset of issues could be discussed**



- November 2022: A table with comments (“Kommentartabelle”) by the participants and responses by BASE/BfS was issued on the BASE website

| Lfd. Nr. | Kap. Nr., Absatz Nr. | Anmerkung * | Anmerkung/Kommentar/Einwendung                                                                                                                                                   | Vorgeschlagene Änderung                                                                                                                                                                                                     | Auswertung Workshop |
|----------|----------------------|-------------|----------------------------------------------------------------------------------------------------------------------------------------------------------------------------------|-----------------------------------------------------------------------------------------------------------------------------------------------------------------------------------------------------------------------------|---------------------|
| E-19     | 4.2 (20)             | <u>tec</u>  | Unklar bleibt jedoch, was in Zusammenhang mit der Dosisabschätzung genau unter gleichwertigen Methoden zu verstehen ist (Originaltext "mindestens gleichwertiger Lösungsansatz") | Eine nähere Erläuterung der Formulierung „gleichwertige Methoden“ oder eine Benennung von Kriterien, nach welchen verwendete Methoden zur Dosisabschätzung als gleichwertig anzusehen sind, wären daher hier wünschenswert. |                     |
| G-23     | 4.2 (20)             | <u>tec</u>  | Dies ist kein Grundsatz                                                                                                                                                          | verschieben in Kapitel 2                                                                                                                                                                                                    |                     |

Einfügen nach 1. Satz:  
 „Lorem ipsum dolor sit  
 amet, consectetur adipisici  
 elit.“

Keine Zustimmung der  
 Teilnehmer:innen, da ...

Will be treated in „Fachlicher Begründungstext“ (technical explanatory document) scheduled for May 2023 (...)

declined

52 decisions (~10%) based on discussion in „Fachworkshop“  
only 4 times additional deepened discussion with authors

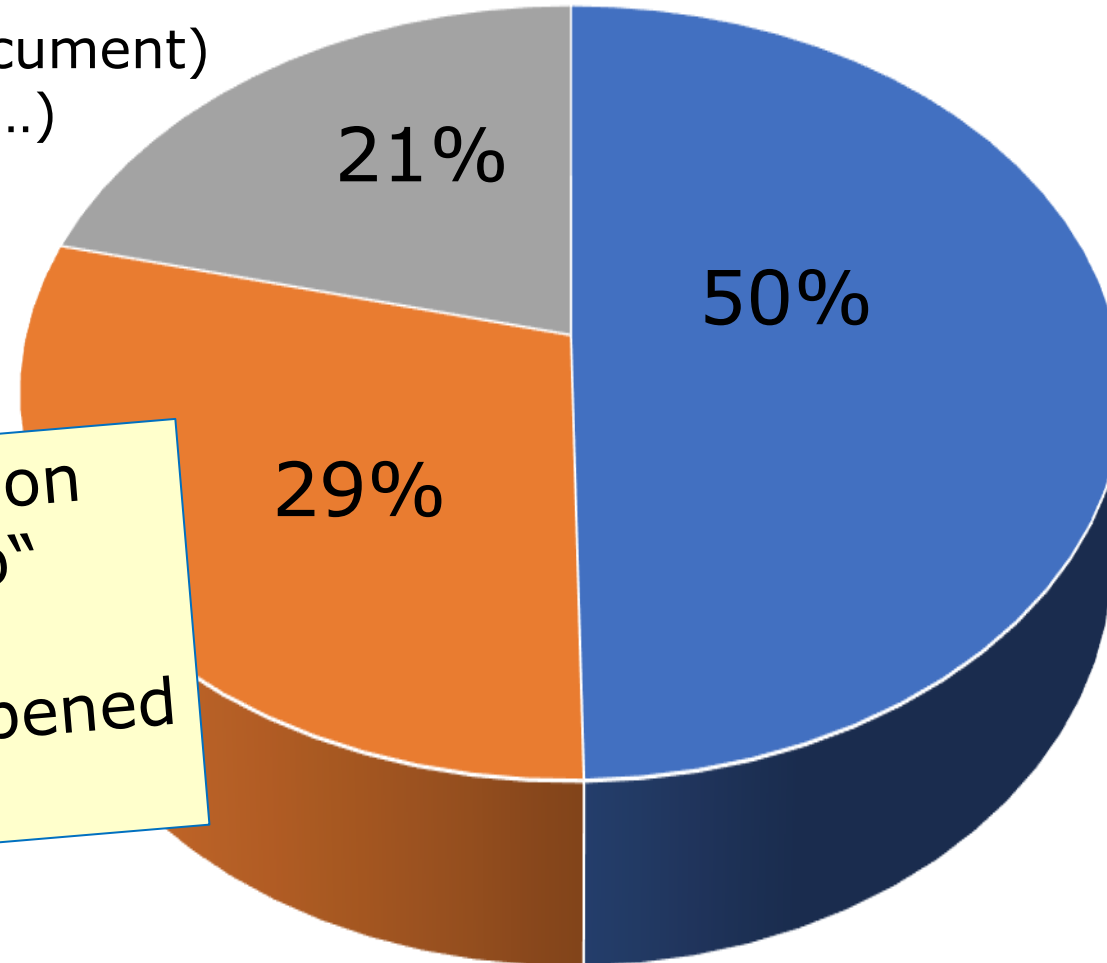

accepted

- The request is understandable. However, implementation is refrained from  
(Der Wunsch ist verständlich. Von einer Umsetzung wird jedoch abgesehen)
- After discussion with authors the approach was deleted  
Nach Diskussion mit Autoren wurde der Anstrich (sic!) gestrichen
- The request was not met because it was probably based on a misunderstanding.  
Dem Anliegen wurde nicht entsprochen, da es vermutlich auf einem Missverständnis beruht.
- The request was rejected. Both the choice of words and the wording are unambiguous.  
Das Anliegen wurde abgelehnt. Sowohl die Wortwahl als auch die Formulierung sind unmissverständlich.



- The following processes will now be taken into account:
  - the (long-term) transport of radionuclides from groundwater through the subsoil into the root zone
  - siltation and shifting of river streams
  
- not accepted:
  - revision of model parameters, e.g. usage of current IAEA transfer factors
  - taking into account attenuation of gamma radiation in irrigated soils
  - usage of reference soils and the  $K_d$  concept
  - some overconservativities e.g. ignoring sedimentation in surface water while taking it into account in the calculation of external exposure at river banks
  
- some comments are planned to be part of the technical explanatory document that has not been issued yet

- Good approach
- Time line OK
- Most smaller comments regarding the phrasing of some text passages have been accepted
  
- Time for discussion in workshop not sufficient.
- No transparent process, why some comments / suggestions were accepted and some were not
- Chance to get in closer contact with authors was not used in all cases

Gefördert durch:

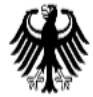

Bundesministerium  
für Umwelt, Naturschutz, nukleare Sicherheit  
und Verbraucherschutz

aufgrund eines Beschlusses  
des Deutschen Bundestages

Gefördert im  
Niedersächsischen Vorab der Volkswagenstiftung

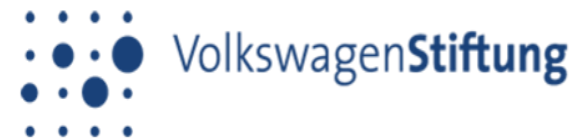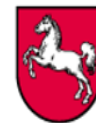

**Niedersächsisches Ministerium  
für Wissenschaft und Kultur**

Förderkennzeichen: 02E11849A-J
